# Supplementary material
Source: PubMed Central journal article supplement (PMC4135181)

Suppl.Fig. 3

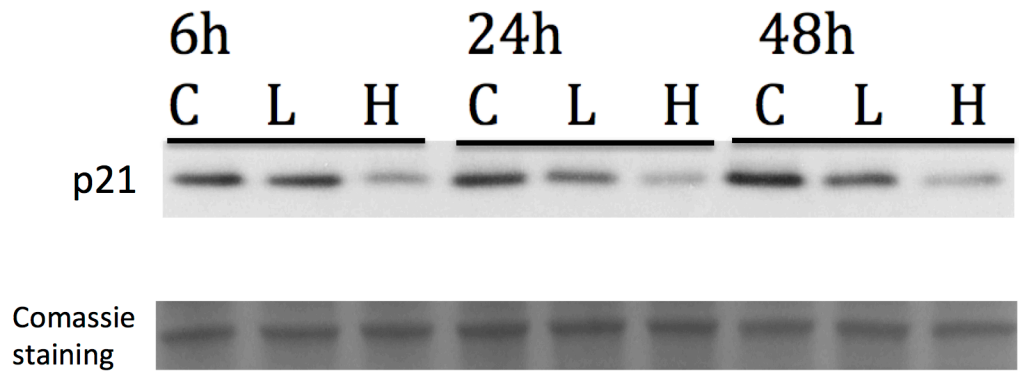

Supplement: NIHMS598617-supplement-01.pdf [file NIHMS598617-supplement-01.pdf]
